# Supplementary material
Source: bioRxiv or medRxiv preprint supplement (https://www.medrxiv.org/highwire/filestream/68276/field_highwire_adjunct_files/0/19001719-1.pdf)
Supplement: Supplementary file [file 19001719-1.pdf]

## Online tables and figures

Table S1: Sociodemographic characteristics for cohort 2

|                            | Comparison Group | Thiazide Diuretics | Beta Blockers | Angiotensin Antagonists | Calcium Channel Blockers | Polytherapy | Other Antihypertensives |
|----------------------------|------------------|--------------------|---------------|-------------------------|--------------------------|-------------|-------------------------|
| <b>Total n</b>             | 502,937          | 8,477              | 90,919        | 48,408                  | 24,634                   | 65,584      | 34,256                  |
| <b>Age</b>                 |                  |                    |               |                         |                          |             |                         |
| Mean                       | 52.8             | 62.2               | 44.7          | 54.4                    | 61.2                     | 57.1        | 62.5                    |
| SD                         | 15.6             | 14.2               | 15.0          | 12.6                    | 13.7                     | 62.5        | 16.7                    |
| <b>SIMD 2016</b>           |                  |                    |               |                         |                          |             |                         |
| Mean                       | 4.78             | 5.17               | 4.59          | 4.87                    | 4.93                     | 4.92        | 4.72                    |
| SD                         | 2.82             | 2.83               | 2.81          | 2.80                    | 2.83                     | 2.83        | 2.78                    |
| <b>Sex</b>                 |                  |                    |               |                         |                          |             |                         |
| Male                       | 39.8             | 21.4               | 34.0          | 46.2                    | 39.2                     | 48.4        | 33.7                    |
| Female                     | 60.2             | 78.6               | 66.1          | 53.8                    | 60.8                     | 51.6        | 66.3                    |
| <b>Matched comparators</b> |                  |                    |               |                         |                          |             |                         |
| N with One                 | na               | 2,392              | 6,329         | 6,818                   | 3,468                    | 16,387      | 6,225                   |
| % with One                 | na               | 28.2               | 7.0           | 14.1                    | 14.1                     | 25.0        | 18.2                    |
| N with Two                 | na               | 6,085              | 84,590        | 41,590                  | 21,166                   | 49,197      | 27,031                  |
| % with Two                 | na               | 71.8               | 93.0          | 85.9                    | 85.9                     | 75.0        | 81.8                    |

Table S2: Medical Event and comorbidity variables, cohort 2

|                            | Comparison Group |      | Thiazide diuretics |      | Beta Blockers |      | Angiotensin Antagonists |      | Calcium Channel Blockers |      | Polytherapy |      | Other Antihypertensives |      |
|----------------------------|------------------|------|--------------------|------|---------------|------|-------------------------|------|--------------------------|------|-------------|------|-------------------------|------|
|                            | n                | %    | n                  | %    | n             | %    | n                       | %    | n                        | %    | n           | %    | n                       | %    |
| <b>Total</b>               | 502,937          | 100  | 8,477              | 100  | 90,919        | 100  | 48,408                  | 100  | 24,634                   | 100  | 65,584      | 100  | 34,256                  | 100  |
| <b>Survival events</b>     |                  |      |                    |      |               |      |                         |      |                          |      |             |      |                         |      |
| Treatment for              | 196,587          | 39.1 | 6,127              | 72.3 | 72,024        | 79.2 | 32,794                  | 67.8 | 16,054                   | 65.2 | 41,685      | 63.6 | 22,289                  | 65.1 |
| Treatment for Bipolar      | 39,998           | 8.0  | 900                | 10.6 | 10,543        | 11.6 | 4,018                   | 8.3  | 2,445                    | 9.9  | 4,817       | 7.3  | 5,321                   | 15.5 |
| Died                       | 48,313           | 9.6  | 1,055              | 12.5 | 4,154         | 4.6  | 3,494                   | 7.2  | 2,404                    | 9.8  | 6,168       | 9.4  | 26,644                  | 9.8  |
| Changed Therapy            |                  |      | 3,323              | 39.2 | 9,101         | 10.0 | 16,250                  | 33.6 | 7,065                    | 28.7 |             |      |                         |      |
| <b>History of hospital</b> |                  |      |                    |      |               |      |                         |      |                          |      |             |      |                         |      |
| Cardiovascular disease     | 18,452           | 3.7  | 801                | 9.5  | 7,245         | 8.0  | 6,368                   | 13.2 | 3,380                    | 13.7 | 22,541      | 34.4 | 6,435                   | 18.8 |
| Substance Abuse            | 84,585           | 16.8 | 1,068              | 12.6 | 16,402        | 18.0 | 9,116                   | 18.8 | 4,694                    | 19.1 | 18,479      | 28.2 | 9,264                   | 27.0 |
| Head Injury                | 29,036           | 5.8  | 303                | 3.6  | 5,552         | 6.1  | 2,517                   | 5.2  | 1,167                    | 4.7  | 3,403       | 5.2  | 1,870                   | 5.5  |
| Self-harm                  | 37,894           | 7.5  | 389                | 4.6  | 10,182        | 11.2 | 3,016                   | 6.2  | 1,491                    | 6.1  | 3,692       | 5.6  | 2,738                   | 8.0  |
| Schizophrenia              | 14,363           | 2.9  | 176                | 2.1  | 1,981         | 2.2  | 1,172                   | 2.4  | 582                      | 2.4  | 1,069       | 1.6  | 1,035                   | 3.0  |
| Major Depressive           | 34,607           | 6.9  | 594                | 7.0  | 8,542         | 9.4  | 3,760                   | 7.8  | 2,039                    | 8.3  | 4,686       | 7.2  | 3,762                   | 11.0 |
| Bipolar Disorder           | 6,708            | 1.3  | 95                 | 1.1  | 1,042         | 1.2  | 626                     | 1.3  | 358                      | 1.5  | 566         | 0.9  | 652                     | 1.9  |
| Other mood disorder        | 4,868            | 1.0  | 112                | 1.3  | 880           | 1.0  | 457                     | 0.9  | 321                      | 1.3  | 509         | 0.8  | 516                     | 1.5  |
| Personality disorder       | 7,019            | 1.4  | 94                 | 1.1  | 1,847         | 2.0  | 620                     | 1.3  | 342                      | 1.4  | 761         | 1.2  | 744                     | 2.2  |
| <b>History of</b>          |                  |      |                    |      |               |      |                         |      |                          |      |             |      |                         |      |
| Other Cardiovascular       | 71,980           | 14.3 | 3,455              | 40.8 | 19,286        | 21.2 | 24,738                  | 51.1 | 12,206                   | 49.6 | 42,175      | 64.3 | 15,581                  | 45.5 |
| Diabetic drugs             | 10,920           | 2.2  | 387                | 4.6  | 2,366         | 2.6  | 8,608                   | 17.8 | 1,217                    | 4.9  | 6,405       | 9.8  | 2,588                   | 7.6  |
| Hypnotics and              | 220,526          | 43.9 | 3,805              | 44.9 | 50,315        | 55.3 | 20,721                  | 42.8 | 11,641                   | 47.3 | 26,868      | 41.0 | 18,279                  | 53.4 |
| Antidepressant Drugs       | 347,152          | 69.0 | 6,370              | 75.1 | 76,640        | 84.3 | 35,738                  | 73.8 | 18,444                   | 74.9 | 42,813      | 65.3 | 24,591                  | 71.8 |
| Psychoses and related      | 40,190           | 8.0  | 591                | 7.0  | 8,081         | 8.9  | 3,251                   | 6.7  | 1,940                    | 7.9  | 3,091       | 4.7  | 4,112                   | 12.0 |

Table S3: Number at risk at start of year, and number of first new onset of Major depressive disorder and Bipolar disorder

|                                  | Year 1<br>N at Risk (N Failures) | Year 2<br>N at Risk (N Failures) | Year 3<br>N at Risk (N Failures) | Year 4<br>N at Risk (N Failures) | Year 5<br>N at Risk (N Failures) | Year 6<br>N at Risk (N Failures) | Year 7<br>N at Risk (N Failures) |
|----------------------------------|----------------------------------|----------------------------------|----------------------------------|----------------------------------|----------------------------------|----------------------------------|----------------------------------|
| <b>Cohort 1</b>                  |                                  |                                  |                                  |                                  |                                  |                                  |                                  |
| <b>Major Depressive Disorder</b> |                                  |                                  |                                  |                                  |                                  |                                  |                                  |
| Comparison                       | 538730 (23057)                   | 469614 (18799)                   | 405964 (15074)                   | 348452 (12655)                   | 295710 (11032)                   | 246646 (7756)                    | 202096 (5667)                    |
| Thiazide Diuretics               | 25555 (1297)                     | 19930 (957)                      | 15961 (698)                      | 12725 (524)                      | 10143 (421)                      | 7854 (285)                       | 5797 (204)                       |
| Beta Blockers                    | 73996 (6619)                     | 55273 (3655)                     | 42852 (2464)                     | 33293 (1740)                     | 25418 (1285)                     | 18904 (755)                      | 13763 (477)                      |
| Angiotensin Antagonists          | 130110 (5909)                    | 98380 (4156)                     | 77952 (2999)                     | 61780 (2313)                     | 48515 (1829)                     | 37245 (1214)                     | 27673 (802)                      |
| Calcium Channel Blockers         | 57986 (2496)                     | 40413 (1716)                     | 29628 (1129)                     | 21775 (786)                      | 15811 (618)                      | 11172 (372)                      | 7822 (230)                       |
| Poltherapy                       | 211282 (10860)                   | 188908 (8799)                    | 168167 (7177)                    | 149290 (6138)                    | 131551 (5716)                    | 114360 (4566)                    | 98269 (3448)                     |
| Other Antihypertensives          | 39801 (2855)                     | 31517 (2050)                     | 25094 (1438)                     | 19962 (1147)                     | 15645 (876)                      | 12004 (589)                      | 8829 (356)                       |
| <b>Bipolar Disorder</b>          |                                  |                                  |                                  |                                  |                                  |                                  |                                  |
| Comparison                       | 538730 (2251)                    | 489992 (2159)                    | 440705 (1949)                    | 392433 (1685)                    | 345094 (1554)                    | 298844 (1224)                    | 252665 (883)                     |
| Thiazide Diuretics               | 2555 (74)                        | 21007 (84)                       | 17658 (73)                       | 14701 (76)                       | 12162 (75)                       | 9772 (44)                        | 7462 (46)                        |
| Beta Blockers                    | 73996 (213)                      | 61040 (212)                      | 50672 (157)                      | 41528 (159)                      | 33248 (131)                      | 25791 (102)                      | 19192 (59)                       |
| Angiotensin Antagonists          | 130110 (198)                     | 103316 (248)                     | 85318 (219)                      | 70153 (180)                      | 57039 (165)                      | 45252 (149)                      | 34695 (95)                       |
| Calcium Channel Blockers         | 57986 (166)                      | 42408 (157)                      | 32547 (158)                      | 24803 (119)                      | 18640 (94)                       | 13684 (79)                       | 9911 (55)                        |
| Poltherapy                       | 211282 (456)                     | 198948 (556)                     | 185439 (600)                     | 171613 (647)                     | 157346 (728)                     | 142594 (695)                     | 127244 (630)                     |
| Other Antihypertensives          | 39801 (432)                      | 33924 (375)                      | 28839 (307)                      | 24304 (217)                      | 20179 (175)                      | 16380 (142)                      | 12710 (79)                       |
| <b>Cohort 2</b>                  |                                  |                                  |                                  |                                  |                                  |                                  |                                  |
| <b>Major Depressive Disorder</b> |                                  |                                  |                                  |                                  |                                  |                                  |                                  |
| Comparison                       | 502937 (166159)                  | 275860 (11728)                   | 218451 (7164)                    | 170967 (4726)                    | 129132 (3440)                    | 91605 (2078)                     | 58853 (1169)                     |
| Thiazide Diuretics               | 8477 (4966)                      | 2597 (296)                       | 1805 (176)                       | 1253 (110)                       | 836 (75)                         | 545 (33)                         | 322 (18)                         |
| Beta Blockers                    | 90919 (63722)                    | 20930 (3537)                     | 13601 (1739)                     | 9026 (951)                       | 5969 (585)                       | 3719 (292)                       | 2150 (123)                       |
| Angiotensin Antagonists          | 48408 (26766)                    | 15301 (1802)                     | 10270 (894)                      | 6975 (548)                       | 4628 (343)                       | 2960 (167)                       | 1693 (77)                        |
| Calcium Channel Blockers         | 24634 (13459)                    | 7286 (806)                       | 4621 (413)                       | 2865 (223)                       | 1668 (137)                       | 935 (55)                         | 498 (25)                         |
| Poltherapy                       | 65584 (33393)                    | 28086 (3198)                     | 21291 (1967)                     | 16279 (1358)                     | 11977 (920)                      | 8413 (521)                       | 5561 (322)                       |
| Other Antihypertensives          | 34256 (19109)                    | 11063 (1417)                     | 7350 (789)                       | 4912 (458)                       | 3204 (276)                       | 1966 (144)                       | 1094 (68)                        |
| <b>Bipolar Disorder</b>          |                                  |                                  |                                  |                                  |                                  |                                  |                                  |
| Comparison                       | 502937 (31457)                   | 388591 (3252)                    | 317545 (1934)                    | 254160 (1365)                    | 195952 (948)                     | 142943 (563)                     | 95775 (330)                      |
| Thiazide Diuretics               | 9477 (541)                       | 6198 (76)                        | 4905 (59)                        | 3881 (47)                        | 2952 (42)                        | 2147 (25)                        | 1393 (6)                         |
| Beta Blockers                    | 90919 (7064)                     | 68267 (1156)                     | 53520 (796)                      | 41064 (506)                      | 30536 (374)                      | 21133 (208)                      | 13526 (128)                      |
| Angiotensin Antagonists          | 48408 (2794)                     | 33754 (287)                      | 25648 (207)                      | 19083 (154)                      | 13817 (91)                       | 9561 (64)                        | 6150 (27)                        |
| Calcium Channel Blockers         | 24634 (1686)                     | 15998 (199)                      | 11484 (135)                      | 7937 (78)                        | 5267 (51)                        | 3372 (39)                        | 2010 (20)                        |
| Poltherapy                       | 65584 (2889)                     | 55916 (539)                      | 48307 (385)                      | 41137 (333)                      | 34066 (288)                      | 27117 (228)                      | 20662 (145)                      |
| Other Antihypertensives          | 34256 (3822)                     | 24054 (557)                      | 18742 (360)                      | 14474 (239)                      | 10787 (176)                      | 7660 (91)                        | 4904 (41)                        |

Figure S1. Flow chart for derivation of cohort 1 sample

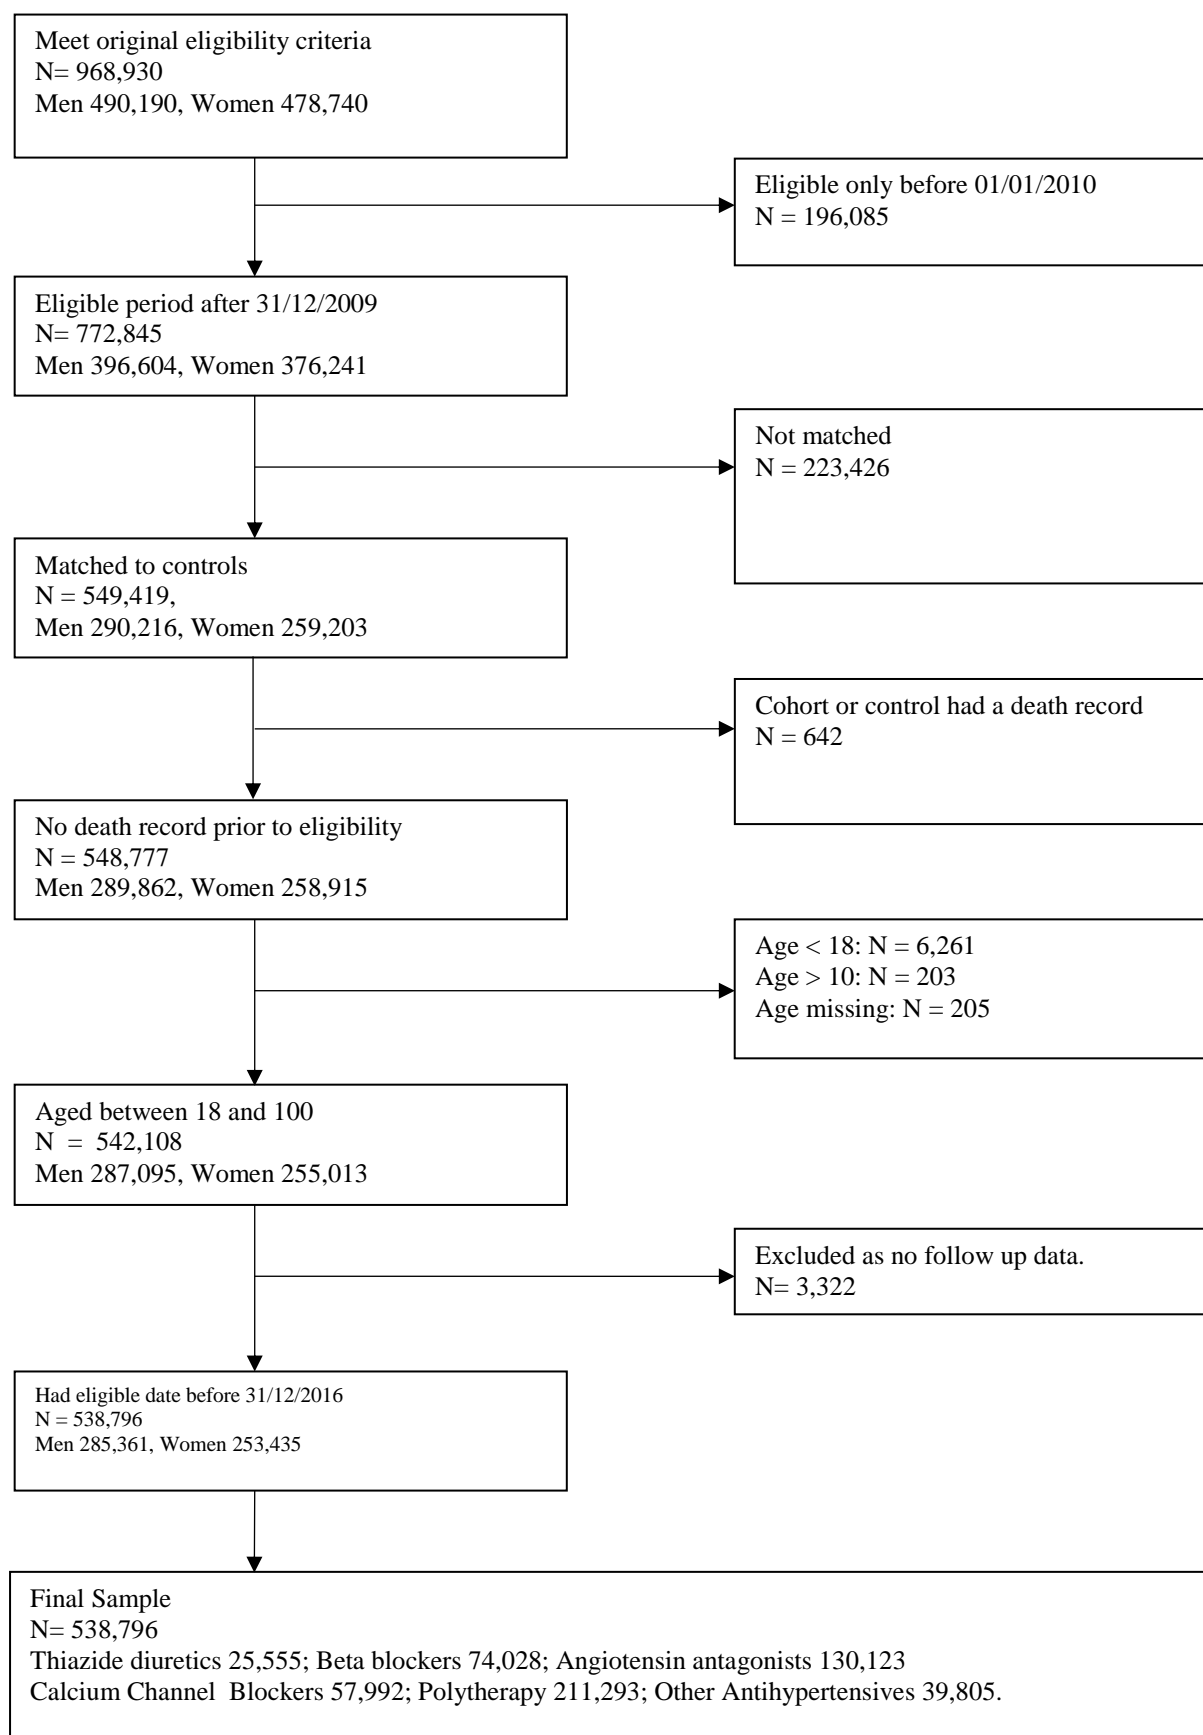

Figure S2: Flow chart for derivation of cohort 2 sample

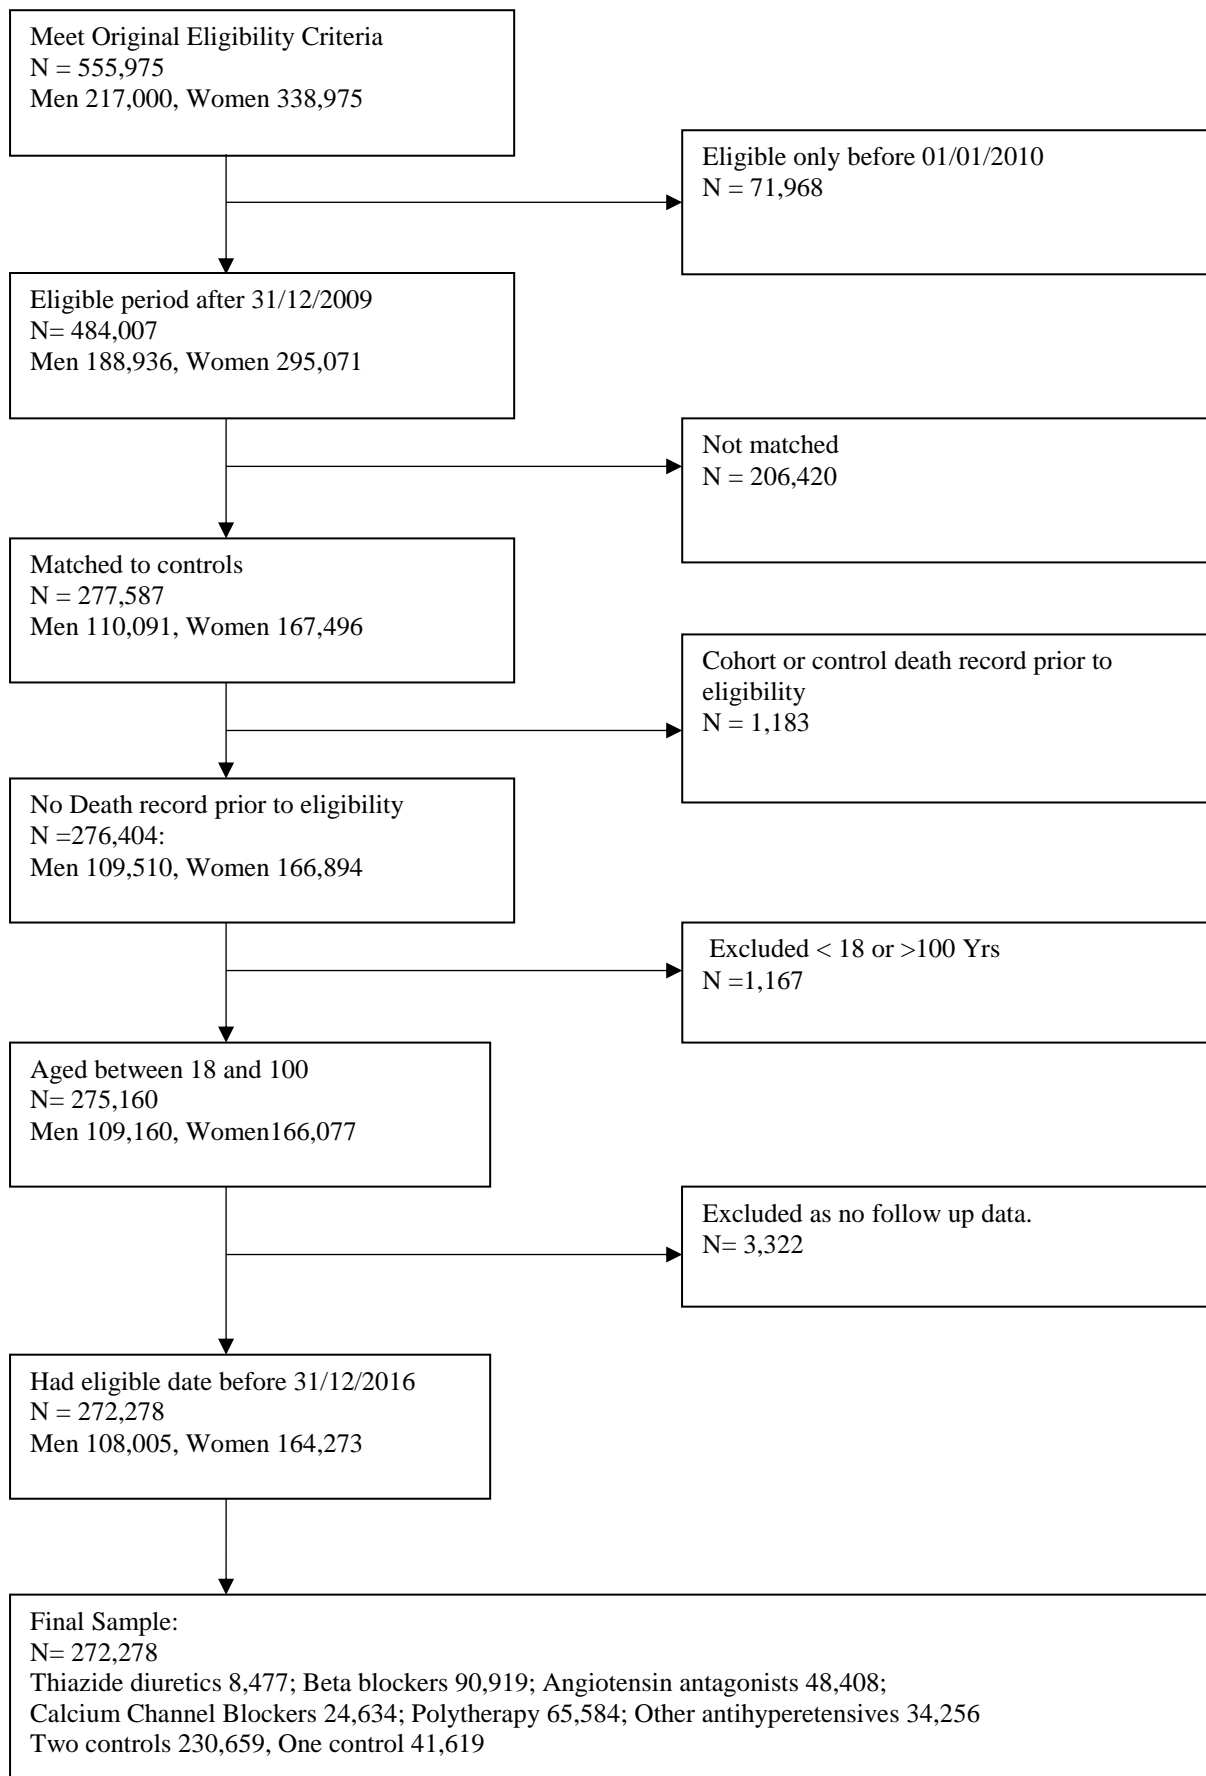

Figure S3: First onset of mood disorders, as indicated by receipt of prescriptions or admission to hospital, by therapy class (people with mental illness).

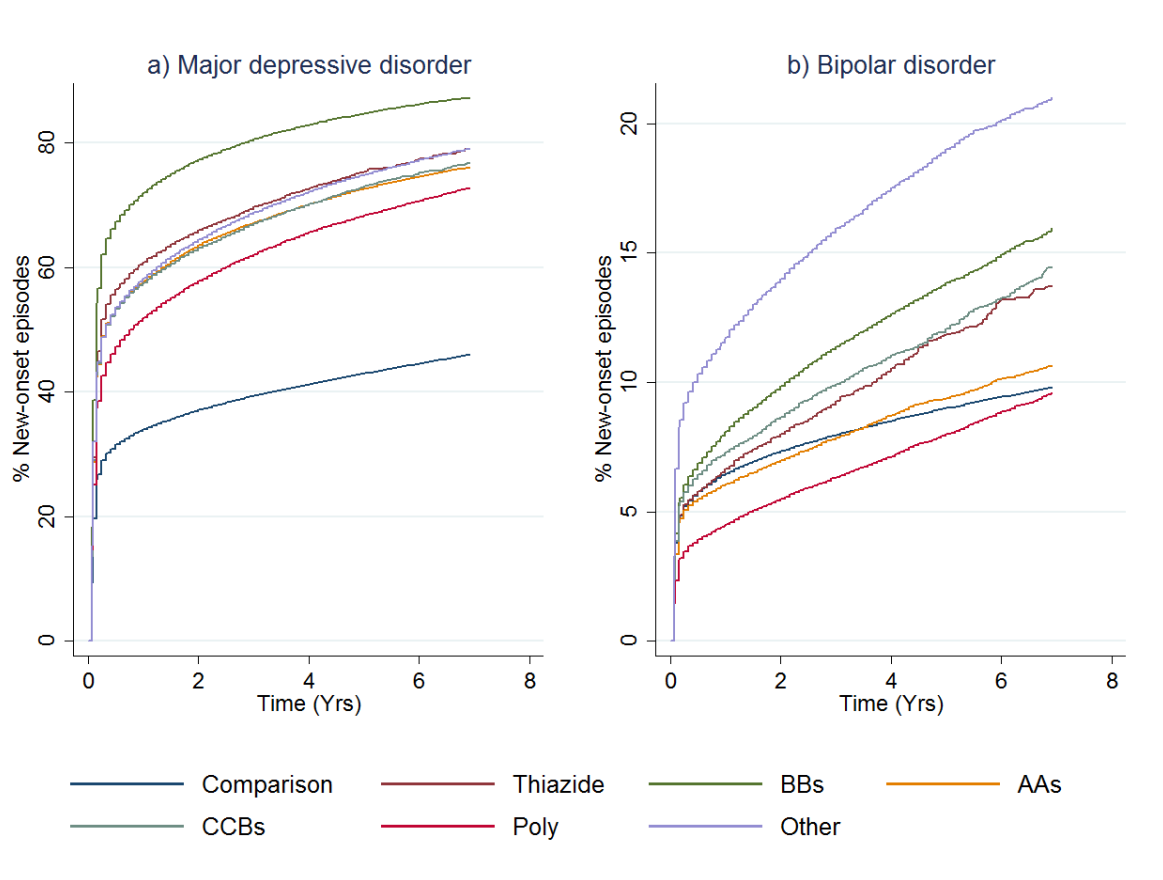

AA – Angiotensin Antagonists, BB – Beta Blockers, CCB – Calcium Channel Blockers

Figure S3 shows cumulative distributions functions for major depressive disorder (panel a) and bipolar disorder (panel b) by therapy class for people with a history of treatment for mental illness (cohort 2).

Figure S4: Hazard ratios for new onset depression, as indicated by receipt of prescriptions or admission to hospital, by therapy class (people with mental illness).

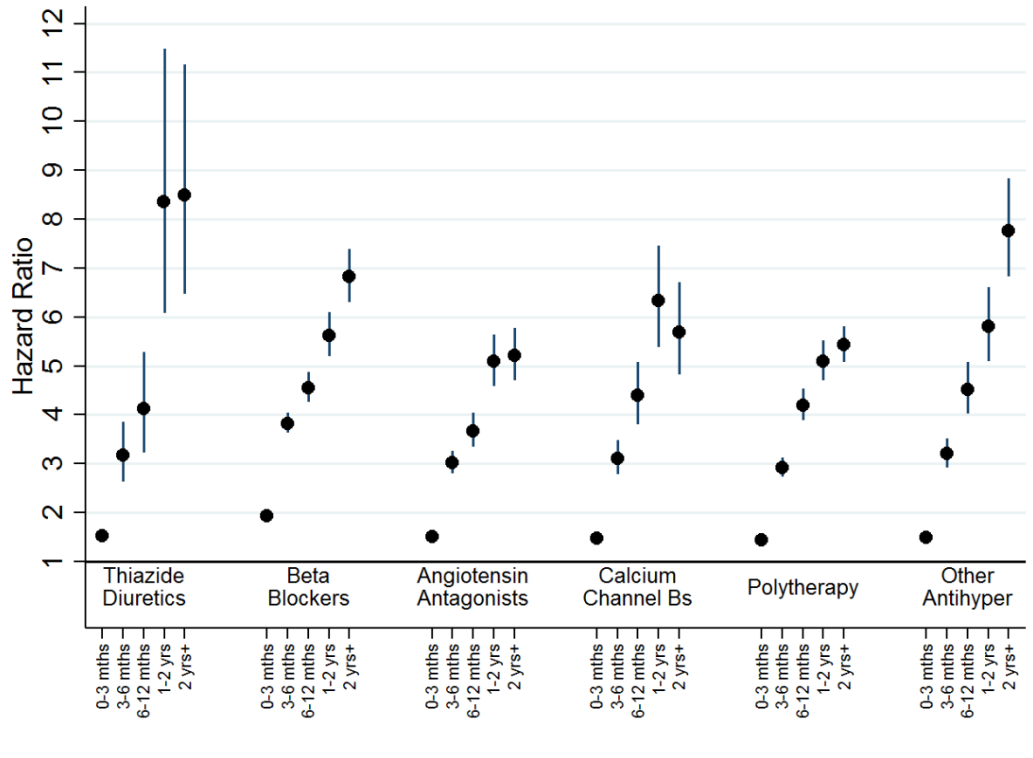

Figure S4: shows hazard ratios for new onset depression by therapy class for people without a history of treatment for mental illness (Cohort 2). Adjustment was carried out for hospital treatment for cardiovascular disease, substance abuse, head injury, self-harm, schizophrenia, major depressive disorder, bipolar disorder, other mood disorders and personality disorder, and pharmaceutical treatment for other cardiovascular drugs, diabetic drugs, hypnotics and anxiolytics, antidepressant drugs, psychoses and related disorders.

Figure S5: Hazard ratios for new onset bipolar disorder, as indicated by receipt of prescriptions or admission to hospital, by therapy class (people with mental illness).

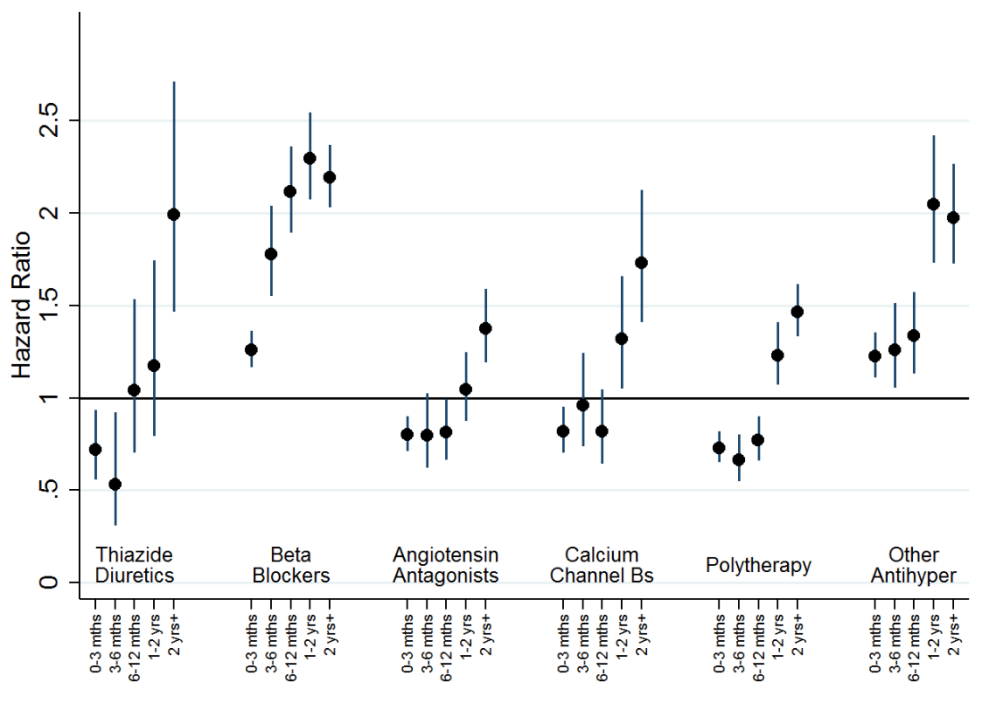

Figure S5 shows hazard ratios for new onset depression by therapy class for people without a history of treatment for mental illness (Cohort 2). Adjustment was carried out for hospital treatment for cardiovascular disease, substance abuse, head injury, self-harm, schizophrenia, major depressive disorder, bipolar disorder, other mood disorders and personality disorder, and pharmaceutical treatment for other cardiovascular drugs, diabetic drugs, hypnotics and anxiolytics, antidepressant drugs, psychoses and related disorders.
